# Supplementary material for: Differential Effects of the Betablockers Carvedilol, Metoprolol and Bisoprolol on Cardiac Kv4.3 (Ito) Channel Isoforms
Source: MDPI journal article supplement (doi:10.3390/ijms241813842), 2023-09-08
Supplement: s1 [file s1]

# Differential Effects of the Betablockers Carvedilol, Metoprolol and Bisoprolol on Cardiac K<sub>v</sub>4.3 (I<sub>to</sub>) Channel Isoforms

Ann-Kathrin Rahm <sup>1,2,3,\*†</sup>, Juline Hackbarth <sup>1,2,†</sup>, Mara E. Müller <sup>1,2,3</sup>, Julia Pfeiffer <sup>1,2</sup>, Heike Gampp <sup>1,2</sup>, Finn Petersenn <sup>1,2</sup>, Rasmus Rivinius <sup>1,2</sup>, Norbert Frey <sup>1,2,3</sup>, Patrick Lugenbiel <sup>1,2,3</sup> and Dierk Thomas <sup>1,2,3</sup>

<sup>1</sup> Heidelberg Center for Heart Rhythm Disorders, Heidelberg University Hospital, 69120 Heidelberg, Germany; mara.mueller@med.uni-heidelberg.de (M.E.M.); rasmus.rivinius@med.uni-heidelberg.de (R.R.); patrick.lugenbiel@med.uni-heidelberg.de (P.L.)

<sup>2</sup> Department of Cardiology, Heidelberg University Hospital, 69120 Heidelberg, Germany

<sup>3</sup> DZHK (German Center for Cardiovascular Research), Partner Site Heidelberg/Mannheim, 69120 Heidelberg, Germany

\* Correspondence: ann-kathrin.rahm@med.uni-heidelberg.de

† These authors contributed equally to this work.

**Table S1 – plasma concentrations of cardioselective betablockers in clinical use**

| <b>Carvedilol</b>                                                    |                                                           |                                                                                                                           |           |
|----------------------------------------------------------------------|-----------------------------------------------------------|---------------------------------------------------------------------------------------------------------------------------|-----------|
| Maximum dosage: 25mg single dose, 50mg daily maximum dose            |                                                           |                                                                                                                           |           |
| Molecular weight: 406.474g/mol                                       |                                                           |                                                                                                                           |           |
| Used dose                                                            | C <sub>max</sub>                                          | Studied group                                                                                                             | Reference |
| 25mg IR (immediate release):                                         | R -> 149.1nM<br>S -> 63.7nM<br>R + S -> 212.8nM           | Patients with stable, mild, moderate, or severe HF as well as survivors of a recent acute myocardial infarction (n = 188) | [36]      |
| 80mg CR (controlled release):                                        | R -> 132.4nM<br>S -> 55.8nM<br>R + S -> 188.2nM           |                                                                                                                           |           |
| 25mg                                                                 | -> 108 (68.7) ng/ml<br>-> 265.7nM                         | Male patients with chronic HF (n = 22)                                                                                    | [37]      |
| 12.5mg on Day 1:<br><br>25mg on Day 9:                               | 46.7 (23.3)ng/ml -> 114.9nM<br>104 (58.9)ng/ml -> 255.9nM | Patients with mild to moderate essential hypertension (n = 12)                                                            | [38]      |
| 25mg                                                                 | -> 53.84 (45.10)ng/ml<br>-> 132,5nM                       | Volunteers (n = 36)                                                                                                       | [39]      |
| 12.5mg Carvedilol                                                    | -> 17.8 ± 11.3ng/ml R<br>-> 8.5 ± 6.4ng/ml S              | Healthy subjects (n = 12)                                                                                                 | [40]      |
| 128 mg SR (slow release) carvedilol                                  | -> 77.04 (66.99)ng/ml<br>-> 189.5nM                       | Healthy male subjects (n = 30)                                                                                            | [41]      |
| <b>Metoprolol</b>                                                    |                                                           |                                                                                                                           |           |
| Maximum dosage: 200mg metoprolol tartrate/190mg metoprolol succinate |                                                           |                                                                                                                           |           |
| Molecular weight: 684.81g/mol (metoprolol tartrate)                  |                                                           |                                                                                                                           |           |
| Used dose                                                            | C <sub>max</sub>                                          | Studied group                                                                                                             | Reference |
| 200mg                                                                | -> Day 1: 17 (82)ng/ml -> 261.4nM                         | Healthy male volunteers (n = 6)                                                                                           | [42]      |

|           |                                                                                                                                                                                            |                                                                                            |      |
|-----------|--------------------------------------------------------------------------------------------------------------------------------------------------------------------------------------------|--------------------------------------------------------------------------------------------|------|
|           | -> Day 8: 247 (167)ng/ml -> 360nM                                                                                                                                                          |                                                                                            |      |
| 2 x 100mg | -> Day 1, Young: 115 ± 24ng/ml<br>-> 167.9nM<br>-> Day 8, Young: 190 ± 20ng/ml<br>-> 277.4nM<br>-> Day 1, Elderly: 106 ± 24ng/ml -> 154.8nM<br>-> Day 8, Elderly: 169 ± 28ng/ml -> 246.8nM | Healthy female volunteers<br>(n = 15)                                                      | [43] |
| 100mg     | -> Control group: 103 (66)ng/ml<br>-> 150.4nM<br>-> Oral contraceptive group: 140 (57)ng/ml<br>-> 204.4nM                                                                                  | Young female volunteers<br>(n = 11 for control group, n = 12 for oral contraceptive group) | [44] |
| 100mg     | -> 210.72 (100.23)ng/ml<br>-> 307.7nM                                                                                                                                                      | Healthy volunteers<br>(n = 32)                                                             | [45] |
| 50mg      | -> 52.7 ± 22.0ng/ml<br>-> 77.0nM                                                                                                                                                           | Healthy male volunteers<br>(n = 12)                                                        | [46] |
| 100mg     | -> 77.67ng/ml<br>-> 113.4nM                                                                                                                                                                | Healthy male volunteers<br>(n = 6)                                                         | [47] |
| 100mg     | -> 101 (54.2)ng/ml<br>-> 147.5nM                                                                                                                                                           | Healthy men<br>(n = 31)                                                                    | [48] |
| 100mg     | -> 132 ± 40.7ng/ml<br>-> 192.8 nM                                                                                                                                                          | Healthy men<br>(n = 12)                                                                    | [49] |
| 50mg      | -> 65.1ng/ml<br>-> 95.1nM                                                                                                                                                                  | Healthy volunteers<br>(n = 20)                                                             | [50] |

### Bisoprolol

Maximum dosage: 10mg, maximum daily dosage of 20mg

Molecular weight: 325.443g/mol

| Used dose | C <sub>max</sub>                                                                                    | Studied group                      | Reference |
|-----------|-----------------------------------------------------------------------------------------------------|------------------------------------|-----------|
| 10mg      | -> 54.3 ± 2.1ng/ml<br>-> 166.8nM                                                                    | Hyperthyroid patients<br>(n = 9)   | [51]      |
| 10mg      | -> 51 (43-63)ng/ml<br>-> 156.7nM                                                                    | Healthy controls<br>(n = 11)       | [52]      |
| 10mg      | -> 32.0 (13.6)ng/ml<br>-> 98.3nM                                                                    | Healthy male volunteers<br>(n = 8) | [53]      |
| 5mg       | Test product<br>-> 20.71 (4.14)ng/ml<br>-> 63.6nM<br>Reference<br>-> 20.67 (4.03)ng/ml<br>-> 63.5nM | Healthy volunteers<br>(n = 18)     | [54]      |
| 10mg      | Test<br>-> 44.2 ± 9.6ng/ml<br>-> 135.6nM<br>Reference<br>-> 43.9 ± 8.3ng/ml<br>-> 134.9 nM          | Healthy volunteers<br>(n = 26)     | [55]      |
| 10mg      | -> 55.5 ± 6.4ng/ml<br>-> 170.5 nM                                                                   | Healthy volunteers<br>(n = 6)      | [56]      |
| 10mg      | -> 52 ng/ml<br>-> 159.8nM                                                                           | Healthy subjects<br>(n = 8)        | [57]      |
